# Supplementary material for: Microbial shifts in the aging mouse gut
Source: Springer Nature journal article supplement (doi:10.1186/s40168-014-0050-9), 2014-12-01
Supplement: MOESM1 [file 40168_2014_50_MOESM1_ESM.pdf]

**Additional File 1:** Individual frailty index scores were obtained for each mouse with a non-invasive clinical frailty index tool that has been described in detail previously (Whitehead et al., 2014). Clinical assessment of the mice included evaluation of the integument, musculoskeletal system, vestibulocochlear and auditory systems, ocular and nasal systems, digestive system, urogenital system, respiratory system, signs of discomfort, as well as the body weight (g) and body surface temperature (°C). A list of each potential deficit evaluated in this study is shown in the left hand column of the table. Each potential deficit could have a minimum score of 0 (no deficit present) and a maximum score of 1 (severe deficit). For each animal, the scores for each deficit were added and divided by the total number of deficits measured (e.g. 31) to yield a frailty index score of between 0 and 1. The average score ( $\pm$  SEM) for each potential deficit for all three age groups is also shown in the table.

| Potential Deficit            | Average Score for Each Potential Deficit ( $\pm$ SEM) |                   |                   |
|------------------------------|-------------------------------------------------------|-------------------|-------------------|
|                              | Young Adult                                           | Older Adult       | Aged              |
| Alopecia (hair loss)         | 0                                                     | 0.625 $\pm$ 0.239 | 0.500 $\pm$ 0.204 |
| Loss of fur colour           | 0                                                     | 0.250 $\pm$ 0.144 | 0.750 $\pm$ 0.144 |
| Dermatitis                   | 0                                                     | 0                 | 0.125 $\pm$ 0.125 |
| Loss of whiskers             | 0                                                     | 0                 | 0.625 $\pm$ 0.125 |
| Coat condition               | 0                                                     | 0                 | 0.125 $\pm$ 0.125 |
| Tumours                      | 0                                                     | 0                 | 0                 |
| Distended abdomen            | 0                                                     | 0.125 $\pm$ 0.125 | 0.500 $\pm$ 0.204 |
| Kyphosis/hunched posture     | 0                                                     | 0                 | 0.125 $\pm$ 0.125 |
| Tail stiffening              | 0                                                     | 0.500 $\pm$ 0     | 0.750 $\pm$ 0.144 |
| Gait                         | 0                                                     | 0                 | 0.375 $\pm$ 0.125 |
| Tremor                       | 0                                                     | 0                 | 0.375 $\pm$ 0.125 |
| Forelimb grip strength       | 0.188 $\pm$ 0.091                                     | 0.125 $\pm$ 0.125 | 0.750 $\pm$ 0.144 |
| Body condition score         | 0                                                     | 0.250 $\pm$ 0.144 | 0.375 $\pm$ 0.239 |
| Head tilt                    | 0                                                     | 0                 | 0                 |
| Hearing loss                 | 0.188 $\pm$ 0.132                                     | 0.375 $\pm$ 0.239 | 1.000 $\pm$ 0     |
| Cataracts                    | 0                                                     | 0                 | 0                 |
| Discharge/swollen/ squinting | 0                                                     | 0                 | 0.125 $\pm$ 0.125 |
| Microphthalmia               | 0                                                     | 0                 | 0                 |
| Corneal opacity              | 0                                                     | 0                 | 0                 |
| Vision loss                  | 0                                                     | 0                 | 0.250 $\pm$ 0.144 |
| Menace reflex                | 0.125 $\pm$ 0.082                                     | 0.125 $\pm$ 0.125 | 0.500 $\pm$ 0.204 |
| Nasal discharge              | 0                                                     | 0                 | 0                 |
| Malocclusions                | 0                                                     | 0                 | 0.125 $\pm$ 0.125 |
| Rectal prolapse              | 0                                                     | 0                 | 0.750 $\pm$ 0.144 |
| Penile/Uterine prolapse      | 0                                                     | 0                 | 0                 |
| Diarrhea                     | 0                                                     | 0                 | 0                 |
| Breathing rate/depth         | 0                                                     | 0                 | 0.500 $\pm$ 0.289 |
| Mouse Grimace Scale          | 0                                                     | 0                 | 0                 |
| Piloerection                 | 0                                                     | 0                 | 0                 |
| Body surface temperature     | 0.094 $\pm$ 0.046                                     | 0                 | 0.062 $\pm$ 0.062 |
| Body weight                  | 0.031 $\pm$ 0.031                                     | 0.875 $\pm$ 0.125 | 0.625 $\pm$ 0.239 |
